# Supplementary material for: Transition metal halide derived phase transition from Cs4PbCl6 to CsPbxM1–xX3 for bright white light-emitting diodes
Source: Royal Society of Chemistry journal article supplement (doi:10.1039/d1tc01150b), 2021-01-01
Supplement: d1tc01150b1.pdf [file d1tc01150b1.pdf]

## Supporting Information

# Transition metal halides derived phase transition from $\text{Cs}_4\text{PbCl}_6$ to $\text{CsPb}_x\text{M}_{1-x}\text{X}_3$ for bright white light-emitting diodes

Wenbin Shi,<sup>a</sup> Xiao Zhang,<sup>b\*</sup> Hsueh Shih Chen,<sup>c</sup> Katarzyna Matras-Postolek,<sup>d</sup> Ping Yang<sup>a\*</sup>

<sup>a</sup>School of Material Science and Engineering, University of Jinan, Jinan, 250022, PR China. E-mail: mse\_yangp@ujn.edu.cn

<sup>b</sup>W/A School of Mines: Minerals, Energy and Chemical Engineering, Curtin University, Perth WA6845, Australia. E-mail: xiao.zhang7@postgrad.curtin.edu.au

<sup>c</sup>Department of Materials Science & Engineering, National Tsing Hua University, Hsinchu City, 300, Taiwan.

<sup>d</sup>Chemical Engineering and Technology, Cracow University of Technology, Warszawska 24 St. 31-155 Krakow, Poland

**Table S1.** Photoluminescence quantum yield of  $\text{MX}_2$  salt treated  $\text{Cs}_4\text{PbCl}_6$  samples.

| Sample                                   | PLQY (%) |
|------------------------------------------|----------|
| $\text{Cs}_4\text{PbCl}_6+\text{ZnCl}_2$ | 74.2     |
| $\text{Cs}_4\text{PbCl}_6+\text{ZnBr}_2$ | 88.1     |
| $\text{Cs}_4\text{PbCl}_6+\text{MnCl}_2$ | 56.8     |
| $\text{Zn}:\text{CsPbCl}_3$              | 13.9     |
| $\text{CsPbCl}_3$                        | 2.3      |
| $\text{CsPbBr}_3$                        | 50.2     |

**Table S2.** Atomic ratio of  $\text{ZnCl}_2$  treated  $\text{Cs}_4\text{PbCl}_6$  NCs from XPS analysis

| Sample                                    | Cs   | Pb   | Zn   | Cl    |
|-------------------------------------------|------|------|------|-------|
| $\text{CsPb}_x\text{Zn}_{1-x}\text{Cl}_3$ | 1.79 | 1.58 | 0.26 | 10.15 |

**Table S3.** Lifetime parameters and PLQYs of samples.

| Sample                                                      | $\tau_{ave}$ (ns) | PLQYs (%) | $\Gamma_{rad}$ ( $\mu\text{S}^{-1}$ ) | $\Gamma_{non-rad}$ ( $\mu\text{S}^{-1}$ ) |
|-------------------------------------------------------------|-------------------|-----------|---------------------------------------|-------------------------------------------|
| Cs <sub>4</sub> PbCl <sub>6</sub> +ZnCl <sub>2</sub> 10 uL  | 20.5              | 52.6      | 20.7                                  | 23.1                                      |
| Cs <sub>4</sub> PbCl <sub>6</sub> +ZnCl <sub>2</sub> 30 uL  | 23.4              | 56.8      | 24.2                                  | 18.4                                      |
| Cs <sub>4</sub> PbCl <sub>6</sub> +ZnCl <sub>2</sub> 50 uL  | 25.1              | 64.1      | 25.5                                  | 14.3                                      |
| Cs <sub>4</sub> PbCl <sub>6</sub> +ZnCl <sub>2</sub> 80 uL  | 26.5              | 70.3      | 26.5                                  | 11.2                                      |
| Cs <sub>4</sub> PbCl <sub>6</sub> +ZnCl <sub>2</sub> 110 uL | 27.7              | 74.2      | 26.8                                  | 9.3                                       |
| Cs <sub>4</sub> PbCl <sub>6</sub> +ZnBr <sub>2</sub> 10 uL  | 5.2               | 8.3       | 15.9                                  | 17.6                                      |
| Cs <sub>4</sub> PbCl <sub>6</sub> +ZnBr <sub>2</sub> 30 uL  | 5.4               | 10.2      | 18.8                                  | 16.6                                      |
| Cs <sub>4</sub> PbCl <sub>6</sub> +ZnBr <sub>2</sub> 50 uL  | 6.2               | 15.5      | 25.1                                  | 13.6                                      |
| Cs <sub>4</sub> PbCl <sub>6</sub> +ZnBr <sub>2</sub> 80 uL  | 16.5              | 78.5      | 47.5                                  | 13.0                                      |
| Cs <sub>4</sub> PbCl <sub>6</sub> +ZnBr <sub>2</sub> 110 uL | 21.3              | 88.1      | 41.4                                  | 5.6                                       |
| Cs <sub>4</sub> PbCl <sub>6</sub> +MnCl <sub>2</sub> 10 uL  | 7.4               | 13.2      | 17.8                                  | 117.3                                     |
| Cs <sub>4</sub> PbCl <sub>6</sub> +MnCl <sub>2</sub> 30 uL  | 9.4               | 18.8      | 20.0                                  | 86.3                                      |
| Cs <sub>4</sub> PbCl <sub>6</sub> +MnCl <sub>2</sub> 50 uL  | 10.9              | 25.6      | 23.4                                  | 68.2                                      |
| Cs <sub>4</sub> PbCl <sub>6</sub> +MnCl <sub>2</sub> 80 uL  | 13.5              | 35.5      | 26.4                                  | 48.8                                      |
| Cs <sub>4</sub> PbCl <sub>6</sub> +MnCl <sub>2</sub> 110 uL | 16.9              | 56.8      | 33.6                                  | 25.6                                      |

The radiative and non-radiative recombination rates were estimated as follows:

$$\Gamma_{rad} = \text{PLQYs}/\tau_{ave} \quad (1)$$

$$\Gamma_{non-rad} = (1-\text{PLQYs})/\tau_{ave} \quad (2)$$

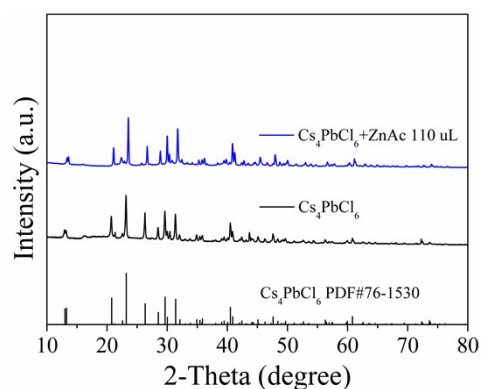**Fig. S1** XRD patterns of ZnAc/hexane solution treated Cs<sub>4</sub>PbCl<sub>6</sub> NCs.

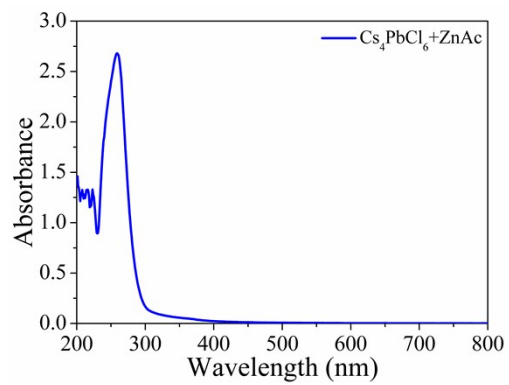

**Fig. S2** Absorption spectra of ZnAc/hexane solution treated  $\text{Cs}_4\text{PbCl}_6$ .

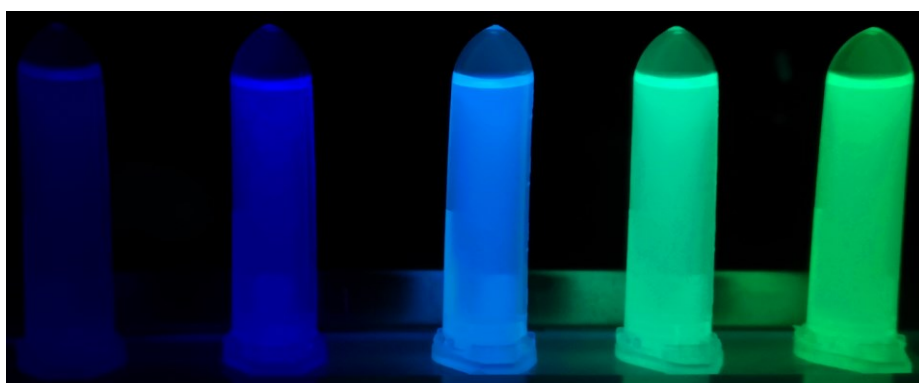

**Fig. S3** Photograph of the ZnBr/hexane solution treated  $\text{Cs}_4\text{PbCl}_6$  under an irradiation of a 365 nm UV lamp.
